# Supplementary material
Source: PubMed Central journal article supplement (PMC4108500)
Supplement: NIHMS601463-supplement-1.pdf [file NIHMS601463-supplement-1.pdf]

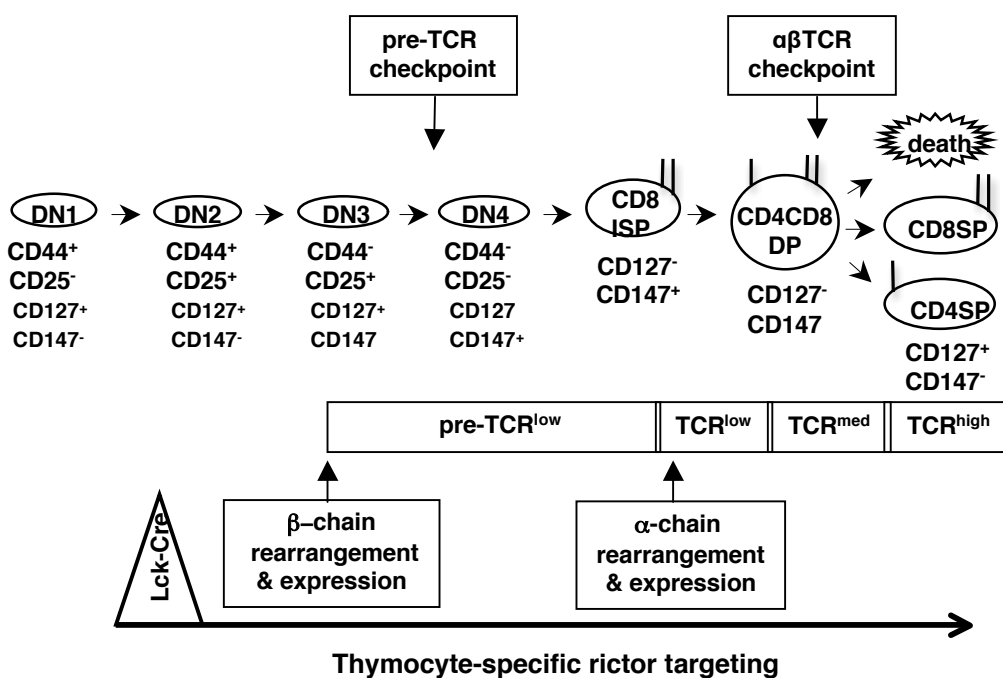

**Supplemental Fig. 1. Cartoon of thymocyte development and concurrent *rictor* deletion.**

Thymocyte development is depicted from the CD4-CD8- double negative (DN) to the CD8 or CD4 single positive (SP). CD8-ISP: immature CD8 expressing single positive cells, CD4CD8 DP: CD4 & CD8 expressing double positive thymocytes. The main surface receptors that characterize each stage are also depicted, as well as the level of pre-TCR and TCR expression. Functionality of the pre-TCR is assessed at the pre-TCR checkpoint between the DN3 and DN4 stages. Functionality of the  $\alpha\beta$ TCR is assessed at the TCR checkpoint during positive selection of DP thymocytes and their differentiation to either the CD4 or the CD8 lineage.

Due to the stage-specific expression of the tyrosine kinase, Lck, rictor deletion started at the DN2 stage prior to the  $\beta$ -selection checkpoint and lasted throughout the entire phase of thymocyte development.

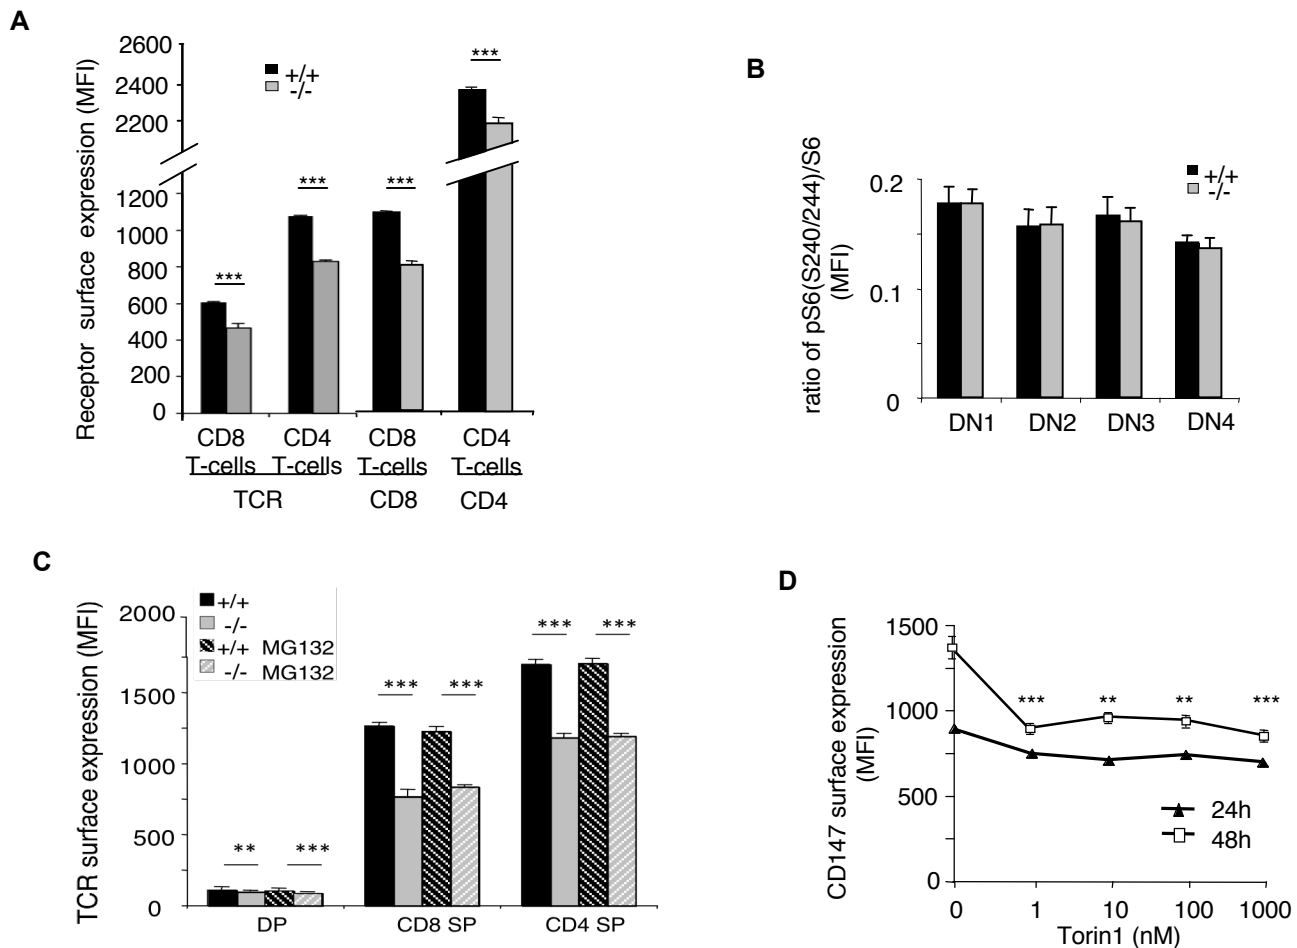

**Supplemental Fig. 2. Rictor-deficiency or the mTORC2 inhibitor, Torin1 but not the proteasomal inhibitor MG132 significantly decreased TCR, CD4, CD8 and CD147 expression on the surface of peripheral or Jurkat T-cells, while no change in phosphorylation of the ribosomal protein S6 was observed in rictor<sup>T-/-</sup> DN cells as compared to wild-type subsets.** **A.** Peripheral T-cells were enriched from wild-type (+/+) and rictor-deficient (-/-) splenocytes. Cells were counted, stained and analyzed by flow cytometry. The MFI of TCR, CD4 or CD8 expressed on peripheral CD4 or CD8 T-cells were plotted from 4 independent experiments. **B.** Thymocytes were fixed with 0.5% paraformaldehyde, permeabilized with 90% MetOH and stained for the intracellular expression and phosphorylation of S6 (n=5). **C.** Thymocytes were cultured ex vivo for 4 hrs in the presence of 50  $\mu$ M of the proteasome inhibitor MG132, stained and analyzed by flow cytometry for TCR expression. The MFI of TCR surface expression was plotted (n=3). **D.** Jurkat T-cells were cultured for 24 or 48 hrs in the presence of the indicated concentrations of Torin1, or its vehicle, harvested, stained and analyzed by flow cytometry for CD147 expression. MFI of CD147 surface expression was plotted from triplicates of 1 representative experiment. Error bars denote standard error of the mean (SEM) and statistical significance was determined by Student's t test. \*\*, p<0.01; \*\*\*, p<0.001.

**Supplemental Table 1:** Primer sequences used for mice genotyping and gene expression by RT-PCR :

| gene                      | Forward primer (5'- 3')            | Reverse primer (5'- 3')  | Band (bp) |
|---------------------------|------------------------------------|--------------------------|-----------|
| Rictor <sup>+/+</sup>     | TTATTAAGTGTGTGGGTTG                | CGTCTTAGTGTTGCTGTCTAG    | 197       |
| Rictor <sup>ff</sup>      | TTATTAAGTGTGTGGGTTG                | CGTCTTAGTGTTGCTGTCTAG    | 295       |
| Lck-Cre                   | GGTTCCCGCAGAACCTGAAG               | GCTAAGTGCCTTCTCTACACC    | 480       |
| Rag-2 <sup>+/+</sup>      | GGGAGGACTCACTTGCCAGTA              | AGTCAGGAGTCTCCATCTCACTGA | 263       |
| Rag-2 <sup>-/-</sup>      | CGGCCGGAGAACCTGCGTGCAA             | AGTCAGGAGTCTCCATCTCACTGA | 350       |
| $\beta_2m$ <sup>+/+</sup> | TATCAGTCTCAGTGGGGGTG               | CTGAGCTCTGTTTTCGTCTG     | 230       |
| $\beta_2m$ <sup>-/-</sup> | TATCAGTCTCAGTGGGGGTG               | GCTATCAGGACATAGCGTTGG    | 210       |
| V $\alpha$ 2              | GACTCTCAGCCTGGAGACTCAGC            | GTTAAATCCCGCTACTTTTCAG   | 477       |
| V $\beta$ 5               | ACGTGTATTCCCATCTCTGG               | CTGTTCATAATTGGCCCGA      | 238       |
|                           | Primers below were used for RT-PCR |                          |           |
| TCR $\alpha$              | AAACTGTGCTGGACATGAAAG              | GGTAAATCCCGCTACTTTTCAG   | 243       |
| TCR $\beta$               | CAGCACGGACCCTCAGGCCTA              | TTTGGGTGAGCCCTCTGGCCA    | 166       |
| CD3 $\epsilon$            | CATTGCTGACTCAACAGCCT               | GGGCTTAGCTATGAGGGCCAA    | 169       |
| CD127                     | AGCCGAGGCTCCCTCTGACCT              | TTCACCCCTTGCTGGGCGGTA    | 143       |
| actin                     | TCCTGAGCGCAAGTACTCTGTGT            | CGGACTCATCGTACTCCTGCTT   | 101       |

**Supplemental Table 2:** Antibodies used for flow cytometry and for IP/immunostaining

| Antigen                                      | clone      | vendor                        |
|----------------------------------------------|------------|-------------------------------|
| TCR $\beta$                                  | H57-597    | Biologend (San Diego, CA)     |
| V $\alpha$ 2                                 | B20.1      | Biologend (San Diego, CA)     |
| V $\beta$ 5                                  | MR9-4      | Biologend (San Diego, CA)     |
| CD3 $\epsilon$                               | 145-2C11   | Biologend (San Diego, CA)     |
| CD4                                          | RM4-5      | Biologend (San Diego, CA)     |
| CD8 $\alpha$                                 | 53.6.7     | Biologend (San Diego, CA)     |
| CD8 $\beta$                                  | YTS156.7.7 | Biologend (San Diego, CA)     |
| CD25                                         | PC61       | Biologend (San Diego, CA)     |
| CD44                                         | IM7        | Biologend (San Diego, CA)     |
| CD69                                         | H1.2F3     | Biologend (San Diego, CA)     |
| CD127                                        | A7R34      | Biologend (San Diego, CA)     |
| CD147                                        | OX-114     | Biologend (San Diego, CA)     |
| S6 ribosomal protein                         | 54D2       | Cell Signaling Technology, MA |
| Phospho-S6 (240/244)                         | D68F8      | Cell Signaling Technology, MA |
| Antibodies below were used for IP/western    |            |                               |
| Rictor                                       | 53A2       | Cell Signaling Technology, MA |
| Akt                                          |            | Cell Signaling Technology, MA |
| phospho-Akt (S473)                           | D9E        | Cell Signaling Technology, MA |
| Phospho-Akt (T450)                           |            | Cell Signaling Technology, MA |
| ERK2                                         |            | Santa Cruz Biotechnology, CA  |
| phospho-p44/42 (Thr202/Tyr204)               |            | Cell Signaling Technology, MA |
| phospho-mTOR (S2481)                         |            | Cell Signaling Technology, MA |
| phospho-FoxO1/3a (Thr24)/(Thr32)             |            | Cell Signaling Technology, MA |
| ubiquitin                                    | 6C1        | Sigma-Aldrich, MO             |
| CD147                                        |            | Santa Cruz Biotechnology, CA  |
| TCR $\beta$                                  | H-197      | Santa Cruz Biotechnology, CA  |
| TCR $\alpha$                                 | H28-710    | Santa Cruz Biotechnology, CA  |
| mTOR                                         | N5D11      | IBL, Japan                    |
| $\beta$ -actin                               | AC-74      | Sigma-Aldrich, MO             |
| Sin1                                         |            | Bethyl, TX                    |
| S6 Ribosomal protein                         | 54D2       | Cell Signaling Technology, MA |
| phospho-S6 (S240/244)                        |            | Cell Signaling Technology, MA |
| phospho-S6 (S235/236)                        | 2F9        | Cell Signaling Technology, MA |
| PKC $\alpha$                                 |            | Cell Signaling Technology, MA |
| phospho-PKC $\alpha$ / $\beta$ II (T638/641) |            | Cell Signaling Technology, MA |
| ULK1                                         | D8H5       | Cell Signaling Technology, MA |
| phospho-ULK1 (S757)                          |            | Cell Signaling Technology, MA |
| LC3                                          |            | Cell Signaling Technology, MA |
| tubulin                                      | YL1/2      | Santa Cruz Biotechnology, CA  |
